# Supplementary material for: Compromised Biomechanical Properties, Cell–Cell Adhesion and Nanotubes Communication in Cardiac Fibroblasts Carrying the Lamin A/C D192G Mutation
Source: MDPI journal article supplement (doi:10.3390/ijms22179193), 2021-08-25

**Supplementary Table S1: Number of measurements and analysed samples during AFM experiments.**

|                                | Fibro-CT | Fibro-WT | Fibro-MT | Fibro-WT+Gap27 |
|--------------------------------|----------|----------|----------|----------------|
| cell number                    | 51       | 87       | 67       | 56             |
| curves number                  | 178      | 261      | 201      | 168            |
| analyzed curves                | 152      | 221      | 177      | 122            |
| flat curves                    | 2        | 0        | 14       | 27             |
| rupture events                 | 230      | 1183     | 540      | 321            |
| nanotubes events               | 199      | 783      | 415      | 192            |
| average rupture events/curve   | 4.51     | 5.35     | 3.05     | 2.63           |
| average nanotubes events/curve | 3.90     | 3.54     | 2.34     | 1.57           |

**Supplementary Figure S1: NRVFs dimensions. A) Cell length. B) Cell width. C) Comparison of TNT width, (\*\* $P < 0.0001$ , \*\* $P < 0.001$ ).**

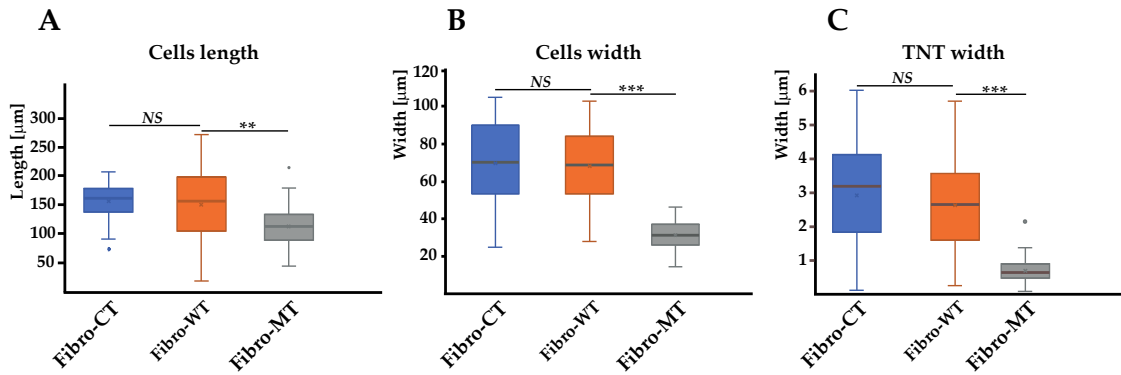

Supplement: s1 [file s1]
